# Supplementary material
Source: PubMed Central journal article supplement (PMC6429567)
Supplement: DS_10.1177_0022034517728496.pdf [file DS_10.1177_0022034517728496.pdf]

## Randomized Clinical Trial of 12% and 38% Silver Diamine Fluoride Treatment

M.H.T. Fung, D. Duangthip, M.C.M. Wong, E.C.M. Lo, and C.H. Chu

### Appendix

**Appendix Table. Children's demographic background, clinical characteristics, and dental health-related habits at 30-month examination**

| Group                                            | Group 1<br>(12% SDF,<br>annual) | Group 2<br>(12% SDF,<br>semi-annual) | Group 3<br>(38% SDF,<br>annual) | Group 4<br>(38% SDF,<br>semi-annual) | <i>p-value</i> |
|--------------------------------------------------|---------------------------------|--------------------------------------|---------------------------------|--------------------------------------|----------------|
| <b>Demographic background</b>                    |                                 |                                      |                                 |                                      |                |
| Sex: Male                                        | 119 (60%)                       | 117 (58%)                            | 120 (59%)                       | 109 (56%)                            | 0.806          |
| Place of birth: Hong Kong                        | 192 (97%)                       | 192 (95%)                            | 194 (96%)                       | 182 (93%)                            | 0.249          |
| Family structure: Both parent<br>Main Care Taker | 187 (95%)                       | 194 (97%)                            | 192 (96%)                       | 188 (97%)                            | 0.740          |
| - Father or mother                               | 135 (68%)                       | 130 (64%)                            | 133 (66%)                       | 125 (64%)                            | 0.883          |
| - Grandparents                                   | 39 (20%)                        | 42 (21%)                             | 38 (19%)                        | 45 (23%)                             |                |
| - Maid or other people                           | 24 (12%)                        | 31 (15%)                             | 31 (15%)                        | 26 (13%)                             |                |
| Father's education level                         |                                 |                                      |                                 |                                      | 0.809          |
| - Primary education                              | 30 (16%)                        | 33 (17%)                             | 29 (15%)                        | 32 (17%)                             |                |
| - Secondary education                            | 131 (69%)                       | 130 (67%)                            | 128 (66%)                       | 117 (62%)                            |                |
| - Post-secondary education                       | 29 (15%)                        | 32 (16%)                             | 37 (19%)                        | 39 (21%)                             |                |
| Mother's education level                         |                                 |                                      |                                 |                                      | 0.643          |
| - Primary education                              | 32 (16%)                        | 30 (15%)                             | 35 (18%)                        | 35 (18%)                             |                |
| - Secondary education                            | 145 (74%)                       | 143 (72%)                            | 132 (66%)                       | 130 (67%)                            |                |
| - Post-secondary education                       | 20 (10%)                        | 25 (13%)                             | 31 (16%)                        | 28 (15%)                             |                |
| Monthly family income                            |                                 |                                      |                                 |                                      | 0.794          |
| - Below HK\$10,000                               | 69 (36%)                        | 69 (35%)                             | 72 (37%)                        | 70 (38%)                             |                |
| - HK\$10,001 - 20,000                            | 71 (37%)                        | 62 (32%)                             | 67 (35%)                        | 59 (32%)                             |                |
| - Above HK\$20,000                               | 50 (26%)                        | 65 (33%)                             | 54 (28%)                        | 54 (30%)                             |                |
| <b>Clinical characteristics</b>                  |                                 |                                      |                                 |                                      |                |
| Mean dmft score                                  | 5.96 (3.39)                     | 5.69 (3.60)                          | 5.78 (3.55)                     | 5.71 (3.39)                          | 0.859          |
| Mean VPI score                                   | 0.44 (0.20)                     | 0.43 (0.21)                          | 0.46 (0.20)                     | 0.43 (0.19)                          | 0.548          |
| Severity of dental caries:                       |                                 |                                      |                                 |                                      | 0.943          |
| - Having 1-3 carious lesions                     | 101 (51%)                       | 105 (52%)                            | 109 (54%)                       | 103 (53%)                            |                |
| - Having >3 carious lesions                      | 97 (49%)                        | 98 (48%)                             | 93 (46%)                        | 93 (47%)                             |                |
| <b>Dental health related habits</b>              |                                 |                                      |                                 |                                      |                |
| Current bottle feeding                           | 33 (17%)                        | 30 (15%)                             | 32 (16%)                        | 27 (14%)                             | 0.867          |
| Daily frequency of snacking                      | 2.12 (1.33)                     | 2.05 (1.21)                          | 1.95 (1.04)                     | 1.84 (1.00)                          | 0.087          |
| Daily frequency of toothbrushing                 |                                 |                                      |                                 |                                      | 0.264          |
| - Twice a day                                    | 135 (68%)                       | 135 (67%)                            | 138 (68%)                       | 137 (70%)                            |                |
| - Once a day                                     | 49 (25%)                        | 61 (30%)                             | 56 (28%)                        | 55 (28%)                             |                |
| - Less than once a day                           | 14 (7%)                         | 7 (3%)                               | 8 (4%)                          | 4 (2%)                               |                |
| Use of fluoride toothpaste                       | 134 (85%)                       | 147 (85%)                            | 138 (84%)                       | 138 (85%)                            | 0.995          |
| Supervised toothbrushing                         | 114 (58%)                       | 116 (57%)                            | 122 (60%)                       | 120 (61%)                            | 0.797          |
